# Supplementary material for: Analysis of Cultivable Microbial Community during Kimchi Fermentation Using MALDI-TOF MS
Source: MDPI journal article supplement (doi:10.3390/foods10051068), 2021-05-12
Supplement: s1 [file s1]

*Supplementary Materials*

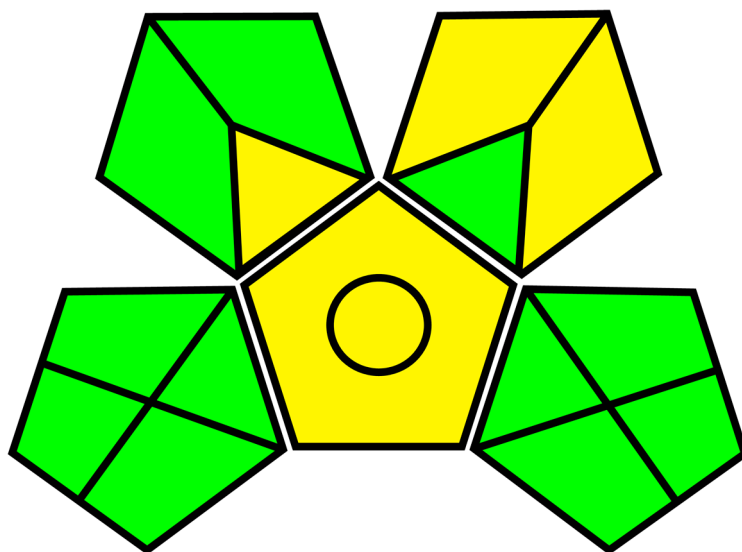

**Figure S1.** Greenness assessment profile for proposed MALDI-TOF MS method for investigating the microbial community in kimchi by GAPI tool

**Table S1.** The green analytical procedure index of the proposed MALDI-TOF MS method

| Parameters                             | MALDI-TOF                                                                                                                                  |
|----------------------------------------|--------------------------------------------------------------------------------------------------------------------------------------------|
| <i>Sample preparation</i>              |                                                                                                                                            |
| Collection (1)                         | <i>In-line</i>                                                                                                                             |
| Preservation (2)                       | None                                                                                                                                       |
| Transport (3)                          | None                                                                                                                                       |
| Storage (4)                            | None                                                                                                                                       |
| Type of method: direct or indirect (5) | Simple procedures                                                                                                                          |
| Scale of extraction (6)                | Micro-extraction                                                                                                                           |
| Solvents/reagents used (7)             | Green solvent                                                                                                                              |
| Additional treatments (8)              | None                                                                                                                                       |
| <i>Reagents and solvents</i>           |                                                                                                                                            |
| Amount (9)                             | 2 $\mu$ L per sample                                                                                                                       |
| Health hazard (10)                     | Formic acid (NFPA <sup>1</sup> : 3), Acetonitrile (NFPA: 2)<br>Trifluoroacetic acid (NFPA: 3), NaOH (NFPA: 3)<br>Distilled water (NFPA: 0) |
| Safety hazard (11)                     | Formic acid (NFPA: 0), Acetonitrile (NFPA: 2)<br>Trifluoroacetic acid (NFPA: 0), NaOH (NFPA: 1)<br>Distilled water (NFPA: 0)               |
| <i>Instrumentation</i>                 |                                                                                                                                            |
| Energy (12)                            | $\leq 0.1$ kWh per sample                                                                                                                  |
| Occupational hazard (13)               | Hermetic sealing of analytical process                                                                                                     |
| Waste (14)                             | 0 mL                                                                                                                                       |
| Waste treatment (15)                   | None                                                                                                                                       |

<sup>1</sup>NFPA: National Fire Protection Association
